# Supplementary material
Source: MDPI journal article supplement (https://www.mdpi.com/2075-163X/12/2/197)
Supplement: s1 [file s1]

**Supplementary Materials**

**Table S1.** LA-ICP-MS U-Pb date of zircons for Late Cambrian - Late Silurian volcanic rocks in Arong Qi.

| Samples     | Th / U | Isotope Ratio                       |        |                                     |        |                                      |        | Age (Ma)                             |       |                                     |       |                                     |       |
|-------------|--------|-------------------------------------|--------|-------------------------------------|--------|--------------------------------------|--------|--------------------------------------|-------|-------------------------------------|-------|-------------------------------------|-------|
|             |        | Pb <sup>207</sup> /U <sup>235</sup> | ±σ     | Pb <sup>206</sup> /U <sup>238</sup> | ±σ     | Pb <sup>208</sup> /Th <sup>232</sup> | ±σ     | Pb <sup>207</sup> /Pb <sup>206</sup> | ±σ    | Pb <sup>207</sup> /U <sup>235</sup> | ±σ    | Pb <sup>206</sup> /U <sup>238</sup> | ±σ    |
| CY-YTTW1-01 | 0.33   | 0.5964                              | 0.0120 | 0.0774                              | 0.0007 | 0.0234                               | 0.0006 | 475.0                                | 7.60  | 480.7                               | 4.38  | 467.0                               | 10.96 |
| CY-YTTW1-02 | 0.63   | 0.6027                              | 0.0106 | 0.0770                              | 0.0006 | 0.0236                               | 0.0006 | 478.9                                | 6.71  | 478.3                               | 3.76  | 471.9                               | 12.46 |
| CY-YTTW1-03 | 0.45   | 0.6414                              | 0.0153 | 0.0818                              | 0.0008 | 0.0244                               | 0.0007 | 503.2                                | 9.47  | 506.9                               | 5.04  | 487.2                               | 14.74 |
| CY-YTTW1-04 | 0.46   | 0.6515                              | 0.0160 | 0.0817                              | 0.0009 | 0.0245                               | 0.0013 | 509.4                                | 9.83  | 506.5                               | 5.42  | 489.3                               | 25.04 |
| CY-YTTW1-05 | 0.37   | 0.6583                              | 0.0228 | 0.0811                              | 0.0013 | 0.0256                               | 0.0015 | 513.6                                | 13.94 | 502.8                               | 7.59  | 510.5                               | 30.45 |
| CY-YTTW1-06 | 0.71   | 0.6393                              | 0.0165 | 0.0814                              | 0.0009 | 0.0252                               | 0.0010 | 501.9                                | 10.20 | 504.6                               | 5.37  | 503.2                               | 19.30 |
| CY-YTTW1-07 | 0.84   | 0.5620                              | 0.0168 | 0.0731                              | 0.0013 | 0.0232                               | 0.0011 | 452.8                                | 10.92 | 455.0                               | 7.52  | 462.8                               | 22.14 |
| CY-YTTW1-08 | 0.58   | 0.6469                              | 0.0135 | 0.0824                              | 0.0011 | 0.0245                               | 0.0012 | 506.6                                | 8.31  | 510.6                               | 6.71  | 489.8                               | 22.91 |
| CY-YTTW1-09 | 0.75   | 0.6503                              | 0.0191 | 0.0818                              | 0.0012 | 0.0250                               | 0.0009 | 508.7                                | 11.78 | 506.8                               | 6.86  | 498.1                               | 17.85 |
| CY-YTTW1-10 | 0.95   | 0.6508                              | 0.0111 | 0.0825                              | 0.0009 | 0.0253                               | 0.0010 | 509.0                                | 6.84  | 510.7                               | 5.34  | 505.1                               | 19.46 |
| CY-YTTW1-11 | 0.85   | 0.5622                              | 0.0167 | 0.0724                              | 0.0011 | 0.0237                               | 0.0010 | 452.9                                | 10.87 | 450.4                               | 6.68  | 473.0                               | 19.71 |
| CY-YTTW1-12 | 0.67   | 0.6075                              | 0.0086 | 0.0775                              | 0.0008 | 0.0240                               | 0.0008 | 482.0                                | 5.46  | 481.5                               | 4.71  | 479.7                               | 16.44 |
| CY-YTTW1-13 | 0.58   | 0.6484                              | 0.0121 | 0.0819                              | 0.0009 | 0.0257                               | 0.0008 | 507.5                                | 7.43  | 507.7                               | 5.29  | 512.8                               | 14.80 |
| CY-YTTW1-14 | 0.60   | 0.6429                              | 0.0098 | 0.0817                              | 0.0006 | 0.0252                               | 0.0006 | 504.1                                | 6.05  | 506.5                               | 3.65  | 503.9                               | 12.61 |
| CY-YTTW1-15 | 1.29   | 0.6438                              | 0.0127 | 0.0813                              | 0.0008 | 0.0241                               | 0.0004 | 504.7                                | 7.86  | 503.7                               | 4.97  | 481.8                               | 8.53  |
| CY-YTTW1-16 | 0.45   | 0.6813                              | 0.0091 | 0.0855                              | 0.0007 | 0.0278                               | 0.0006 | 527.6                                | 5.51  | 529.0                               | 4.14  | 553.9                               | 10.92 |
| CY-YTTW1-17 | 0.68   | 0.6605                              | 0.0311 | 0.0825                              | 0.0018 | 0.0248                               | 0.0012 | 515.0                                | 19.02 | 510.8                               | 10.49 | 495.4                               | 24.61 |
| CY-YTTW1-18 | 0.47   | 0.6603                              | 0.0183 | 0.0818                              | 0.0013 | 0.0258                               | 0.0006 | 514.8                                | 11.16 | 507.1                               | 7.47  | 514.4                               | 12.18 |
| CY-YTTW1-19 | 0.45   | 0.6516                              | 0.0164 | 0.0824                              | 0.0010 | 0.0241                               | 0.0007 | 509.5                                | 10.10 | 510.3                               | 6.06  | 481.0                               | 14.29 |
| CY-YTTW1-20 | 0.76   | 0.6531                              | 0.0139 | 0.0816                              | 0.0007 | 0.0245                               | 0.0004 | 510.4                                | 8.56  | 505.5                               | 4.38  | 488.5                               | 7.30  |
| CY-YTTW1-21 | 0.52   | 0.6482                              | 0.0104 | 0.0817                              | 0.0008 | 0.0252                               | 0.0003 | 507.4                                | 6.40  | 506.0                               | 4.68  | 503.4                               | 6.81  |
| CY-YTTW1-22 | 0.51   | 0.6030                              | 0.0151 | 0.0777                              | 0.0008 | 0.0238                               | 0.0005 | 479.1                                | 9.54  | 482.5                               | 4.49  | 476.1                               | 10.38 |
| CY-YTTW1-23 | 0.40   | 0.7096                              | 0.0150 | 0.0890                              | 0.0008 | 0.0263                               | 0.0006 | 544.5                                | 8.90  | 549.4                               | 4.85  | 524.6                               | 12.27 |
| CY-YTTW1-24 | 0.50   | 0.7214                              | 0.0147 | 0.0888                              | 0.0009 | 0.0286                               | 0.0007 | 551.5                                | 8.69  | 548.7                               | 5.27  | 570.3                               | 14.20 |
| CY-YTTW1-25 | 1.21   | 0.6193                              | 0.0159 | 0.0776                              | 0.0007 | 0.0247                               | 0.0005 | 489.4                                | 9.94  | 481.9                               | 4.46  | 493.3                               | 9.73  |
| CY-YTTW1-26 | 0.82   | 0.6580                              | 0.0170 | 0.0822                              | 0.0012 | 0.0249                               | 0.0006 | 513.4                                | 10.40 | 508.9                               | 7.32  | 496.6                               | 11.24 |
| CY-YTTW1-27 | 0.62   | 0.6522                              | 0.0129 | 0.0816                              | 0.0009 | 0.0245                               | 0.0003 | 509.8                                | 7.90  | 506.0                               | 5.65  | 489.2                               | 6.15  |
| CY-YTTW1-28 | 0.32   | 0.5609                              | 0.0129 | 0.0721                              | 0.0007 | 0.0221                               | 0.0007 | 452.1                                | 8.38  | 448.5                               | 4.47  | 442.7                               | 13.18 |
| CY-YTTW1-29 | 0.57   | 0.6563                              | 0.0135 | 0.0822                              | 0.0008 | 0.0244                               | 0.0004 | 512.3                                | 8.30  | 509.5                               | 4.93  | 487.2                               | 7.28  |
| CY-YTTW1-30 | 0.55   | 0.6585                              | 0.0170 | 0.0812                              | 0.0012 | 0.0256                               | 0.0006 | 513.7                                | 10.43 | 503.5                               | 6.97  | 510.9                               | 11.54 |
| CY-YTTW1-31 | 0.63   | 0.6034                              | 0.0156 | 0.0779                              | 0.0011 | 0.0248                               | 0.0006 | 479.4                                | 9.88  | 483.4                               | 6.47  | 495.1                               | 11.19 |
| CY-YTTW1-32 | 0.40   | 0.6612                              | 0.0148 | 0.0823                              | 0.0011 | 0.0250                               | 0.0006 | 515.4                                | 9.02  | 510.0                               | 6.40  | 499.1                               | 12.56 |
| CY-YTTW1-33 | 0.48   | 0.6213                              | 0.0165 | 0.0803                              | 0.0011 | 0.0240                               | 0.0007 | 490.7                                | 10.33 | 498.2                               | 6.71  | 478.6                               | 13.06 |

|              |      |        |        |        |        |        |        |       |       |       |      |       |       |
|--------------|------|--------|--------|--------|--------|--------|--------|-------|-------|-------|------|-------|-------|
| CY-YTTW1-34  | 0.46 | 0.6430 | 0.0140 | 0.0820 | 0.0008 | 0.0255 | 0.0006 | 504.1 | 8.66  | 507.8 | 4.89 | 509.9 | 11.96 |
| CY-YTTW1-35  | 0.92 | 0.6659 | 0.0140 | 0.0825 | 0.0012 | 0.0250 | 0.0004 | 518.2 | 8.55  | 511.0 | 7.17 | 499.3 | 7.33  |
| CY-YTTW1-36  | 0.67 | 0.6584 | 0.0185 | 0.0821 | 0.0009 | 0.0258 | 0.0006 | 513.6 | 11.34 | 508.6 | 5.60 | 515.3 | 12.32 |
| CY-YTTW1-37  | 0.47 | 0.6459 | 0.0171 | 0.0820 | 0.0012 | 0.0252 | 0.0007 | 506.0 | 10.57 | 507.9 | 6.85 | 502.1 | 14.12 |
| CY-YTTW1-38  | 0.70 | 0.6520 | 0.0123 | 0.0818 | 0.0009 | 0.0248 | 0.0004 | 509.7 | 7.55  | 507.0 | 5.09 | 495.3 | 7.59  |
| CY-YTTW1-39  | 0.73 | 0.6381 | 0.0203 | 0.0812 | 0.0015 | 0.0252 | 0.0007 | 501.1 | 12.61 | 503.1 | 9.21 | 503.7 | 14.76 |
| CY-YTTW1-40  | 0.49 | 0.7228 | 0.0210 | 0.0888 | 0.0014 | 0.0250 | 0.0009 | 552.3 | 12.35 | 548.6 | 8.50 | 499.0 | 16.85 |
| CY-YTTW1-41  | 0.32 | 0.6125 | 0.0175 | 0.0767 | 0.0011 | 0.0228 | 0.0010 | 485.1 | 11.02 | 476.1 | 6.51 | 454.9 | 20.09 |
| CY-YTTW1-42  | 0.49 | 0.6367 | 0.0162 | 0.0817 | 0.0015 | 0.0236 | 0.0008 | 500.3 | 10.07 | 506.0 | 9.23 | 470.8 | 15.98 |
| CY-YTTW1-43  | 0.53 | 0.6584 | 0.0070 | 0.0815 | 0.0009 | 0.0241 | 0.0003 | 513.6 | 4.28  | 505.2 | 5.28 | 480.4 | 6.31  |
| CY-YTTW1-44  | 0.46 | 0.6556 | 0.0119 | 0.0816 | 0.0008 | 0.0246 | 0.0005 | 511.9 | 7.29  | 505.8 | 4.66 | 490.7 | 9.63  |
| CY-YTTW1-45  | 0.27 | 0.6034 | 0.0127 | 0.0769 | 0.0010 | 0.0236 | 0.0008 | 479.4 | 8.01  | 477.4 | 6.19 | 471.0 | 16.39 |
| CY-YTTW1-46  | 0.92 | 0.6529 | 0.0135 | 0.0815 | 0.0009 | 0.0251 | 0.0008 | 510.3 | 8.30  | 504.9 | 5.10 | 500.7 | 15.09 |
| D5396-TW1-01 | 0.82 | 0.5885 | 0.0117 | 0.0748 | 0.0008 | 0.0238 | 0.0005 | 469.9 | 7.48  | 465.1 | 4.92 | 475.3 | 8.92  |
| D5396-TW1-02 | 0.93 | 0.5839 | 0.0092 | 0.0747 | 0.0009 | 0.0250 | 0.0004 | 467.0 | 5.92  | 464.1 | 5.26 | 498.8 | 7.62  |
| D5396-TW1-03 | 0.63 | 0.5712 | 0.0341 | 0.0729 | 0.0016 | 0.0220 | 0.0015 | 458.8 | 22.04 | 453.5 | 9.59 | 440.0 | 29.29 |
| D5396-TW1-04 | 0.65 | 0.5733 | 0.0290 | 0.0722 | 0.0012 | 0.0241 | 0.0013 | 460.2 | 18.75 | 449.2 | 7.18 | 481.7 | 25.69 |
| D5396-TW1-05 | 0.73 | 0.5686 | 0.0105 | 0.0725 | 0.0007 | 0.0237 | 0.0007 | 457.1 | 6.78  | 450.9 | 4.41 | 473.3 | 14.44 |
| D5396-TW1-06 | 0.92 | 0.5631 | 0.0192 | 0.0721 | 0.0011 | 0.0235 | 0.0014 | 453.6 | 12.50 | 448.7 | 6.38 | 470.0 | 27.32 |
| D5396-TW1-07 | 0.88 | 0.5613 | 0.0146 | 0.0730 | 0.0011 | 0.0220 | 0.0009 | 452.4 | 9.51  | 454.4 | 6.58 | 439.0 | 17.13 |
| D5396-TW1-08 | 0.68 | 0.5656 | 0.0178 | 0.0735 | 0.0011 | 0.0235 | 0.0009 | 455.2 | 11.53 | 457.2 | 6.57 | 470.3 | 18.43 |
| D5396-TW1-09 | 0.40 | 0.5626 | 0.0454 | 0.0723 | 0.0016 | 0.0255 | 0.0020 | 453.2 | 29.52 | 450.1 | 9.37 | 508.3 | 39.03 |
| D5396-TW1-10 | 0.52 | 0.5755 | 0.0214 | 0.0738 | 0.0011 | 0.0251 | 0.0011 | 461.6 | 13.80 | 459.1 | 6.31 | 500.6 | 20.94 |
| D5396-TW1-11 | 1.19 | 0.5765 | 0.0163 | 0.0742 | 0.0008 | 0.0226 | 0.0006 | 462.2 | 10.49 | 461.6 | 5.01 | 451.9 | 10.91 |
| D5396-TW1-12 | 0.39 | 0.5678 | 0.0242 | 0.0740 | 0.0013 | 0.0244 | 0.0015 | 456.6 | 15.68 | 460.3 | 8.00 | 487.9 | 30.33 |
| D5396-TW1-13 | 0.60 | 0.5421 | 0.0140 | 0.0699 | 0.0008 | 0.0222 | 0.0006 | 439.8 | 9.19  | 435.3 | 4.79 | 444.4 | 11.20 |
| D5396-TW1-14 | 0.48 | 0.5692 | 0.0248 | 0.0738 | 0.0010 | 0.0242 | 0.0012 | 457.5 | 16.06 | 458.9 | 6.19 | 483.4 | 23.07 |
| D5396-TW1-15 | 0.49 | 0.5519 | 0.0269 | 0.0729 | 0.0012 | 0.0218 | 0.0011 | 446.2 | 17.57 | 453.5 | 7.00 | 435.0 | 22.74 |
| D5396-TW1-16 | 0.45 | 0.5705 | 0.0221 | 0.0728 | 0.0011 | 0.0212 | 0.0009 | 458.3 | 14.26 | 453.2 | 6.34 | 424.1 | 17.48 |
| D5396-TW1-17 | 0.50 | 0.5608 | 0.0270 | 0.0724 | 0.0010 | 0.0227 | 0.0010 | 452.0 | 17.55 | 450.8 | 6.18 | 454.2 | 20.13 |
| D5396-TW1-18 | 0.76 | 0.5624 | 0.0185 | 0.0728 | 0.0008 | 0.0217 | 0.0007 | 453.1 | 12.01 | 452.7 | 4.59 | 433.3 | 13.42 |
| D5396-TW1-19 | 0.98 | 0.5724 | 0.0161 | 0.0730 | 0.0010 | 0.0213 | 0.0006 | 459.5 | 10.38 | 454.0 | 5.80 | 425.4 | 12.15 |
| D5396-TW1-20 | 0.81 | 0.5517 | 0.0143 | 0.0731 | 0.0007 | 0.0224 | 0.0005 | 446.1 | 9.34  | 454.7 | 3.98 | 448.0 | 9.17  |
| D5396-TW1-21 | 1.57 | 0.5672 | 0.0141 | 0.0723 | 0.0008 | 0.0220 | 0.0008 | 456.2 | 9.16  | 450.3 | 4.70 | 439.8 | 15.35 |
| D5396-TW1-22 | 0.75 | 0.5620 | 0.0158 | 0.0729 | 0.0008 | 0.0219 | 0.0006 | 452.8 | 10.26 | 453.6 | 5.03 | 438.7 | 12.09 |

|              |      |        |        |        |        |        |        |       |       |       |      |       |       |
|--------------|------|--------|--------|--------|--------|--------|--------|-------|-------|-------|------|-------|-------|
| D5396-TW1-23 | 1.03 | 0.5675 | 0.0167 | 0.0733 | 0.0007 | 0.0224 | 0.0005 | 456.4 | 10.84 | 455.7 | 4.23 | 447.9 | 9.10  |
| D5396-TW1-24 | 0.47 | 0.5619 | 0.0268 | 0.0733 | 0.0010 | 0.0213 | 0.0012 | 452.7 | 17.44 | 455.8 | 5.93 | 426.7 | 23.88 |
| D5396-TW1-25 | 0.89 | 0.5631 | 0.0167 | 0.0731 | 0.0008 | 0.0217 | 0.0005 | 453.6 | 10.84 | 454.6 | 4.76 | 433.6 | 10.43 |
| D5396-TW1-26 | 0.55 | 0.5647 | 0.0121 | 0.0734 | 0.0006 | 0.0224 | 0.0004 | 454.6 | 7.85  | 456.5 | 3.65 | 448.6 | 8.56  |
| D5396-TW1-27 | 0.40 | 0.5719 | 0.0389 | 0.0737 | 0.0013 | 0.0208 | 0.0013 | 459.3 | 25.11 | 458.2 | 7.75 | 415.7 | 26.66 |
| D5396-TW1-28 | 0.46 | 0.5724 | 0.0241 | 0.0738 | 0.0010 | 0.0227 | 0.0009 | 459.6 | 15.58 | 458.8 | 5.89 | 454.4 | 16.83 |
| D5396-TW1-29 | 0.68 | 0.5798 | 0.0166 | 0.0743 | 0.0008 | 0.0237 | 0.0007 | 464.3 | 10.66 | 461.8 | 5.08 | 473.1 | 13.86 |
| D5396-TW1-30 | 0.68 | 0.5705 | 0.0244 | 0.0736 | 0.0011 | 0.0212 | 0.0007 | 458.3 | 15.75 | 458.0 | 6.47 | 424.4 | 12.89 |
| D5396-TW2-01 | 0.84 | 0.5543 | 0.0160 | 0.0711 | 0.0013 | 0.0232 | 0.0015 | 447.8 | 10.46 | 443.0 | 7.95 | 463.5 | 30.37 |
| D5396-TW2-02 | 0.94 | 0.5766 | 0.0106 | 0.0745 | 0.0009 | 0.0248 | 0.0004 | 462.2 | 6.86  | 463.3 | 5.62 | 495.1 | 8.25  |
| D5396-TW2-03 | 0.63 | 0.5410 | 0.0251 | 0.0710 | 0.0012 | 0.0220 | 0.0010 | 439.1 | 16.55 | 442.2 | 7.28 | 440.4 | 20.06 |
| D5396-TW2-04 | 0.76 | 0.5449 | 0.0119 | 0.0712 | 0.0007 | 0.0224 | 0.0006 | 441.6 | 7.79  | 443.4 | 4.05 | 447.7 | 12.15 |
| D5396-TW2-05 | 0.71 | 0.5575 | 0.0127 | 0.0711 | 0.0006 | 0.0227 | 0.0008 | 449.9 | 8.26  | 443.0 | 3.62 | 453.0 | 16.52 |
| D5396-TW2-06 | 1.11 | 0.5468 | 0.0168 | 0.0703 | 0.0012 | 0.0226 | 0.0013 | 442.9 | 11.05 | 437.7 | 6.96 | 452.5 | 25.46 |
| D5396-TW2-07 | 0.93 | 0.5530 | 0.0135 | 0.0716 | 0.0009 | 0.0217 | 0.0006 | 447.0 | 8.84  | 446.0 | 5.66 | 434.4 | 11.15 |
| D5396-TW2-08 | 0.46 | 0.5431 | 0.0194 | 0.0716 | 0.0010 | 0.0226 | 0.0009 | 440.5 | 12.74 | 445.6 | 5.94 | 452.4 | 18.56 |
| D5396-TW2-09 | 0.41 | 0.5824 | 0.0461 | 0.0716 | 0.0015 | 0.0260 | 0.0021 | 466.0 | 29.60 | 446.0 | 9.26 | 517.8 | 40.67 |
| D5396-TW2-10 | 0.47 | 0.5486 | 0.0233 | 0.0725 | 0.0012 | 0.0255 | 0.0012 | 444.1 | 15.29 | 451.0 | 7.14 | 508.8 | 22.99 |
| D5396-TW2-11 | 1.23 | 0.5443 | 0.0207 | 0.0726 | 0.0012 | 0.0212 | 0.0007 | 441.3 | 13.58 | 451.7 | 7.05 | 424.6 | 13.09 |
| D5396-TW2-12 | 0.40 | 0.5548 | 0.0195 | 0.0719 | 0.0009 | 0.0235 | 0.0010 | 448.1 | 12.75 | 447.9 | 5.24 | 470.4 | 19.15 |
| D5396-TW2-13 | 0.58 | 0.5340 | 0.0176 | 0.0704 | 0.0010 | 0.0230 | 0.0008 | 434.5 | 11.67 | 438.5 | 6.26 | 459.3 | 16.73 |
| D5396-TW2-14 | 0.50 | 0.5494 | 0.0314 | 0.0721 | 0.0014 | 0.0226 | 0.0014 | 444.6 | 20.56 | 449.0 | 8.32 | 450.9 | 27.20 |
| D5396-TW2-15 | 0.50 | 0.5413 | 0.0190 | 0.0713 | 0.0008 | 0.0233 | 0.0008 | 439.3 | 12.51 | 443.8 | 4.85 | 465.3 | 15.49 |
| D5396-TW2-16 | 0.52 | 0.5524 | 0.0172 | 0.0711 | 0.0009 | 0.0218 | 0.0008 | 446.6 | 11.23 | 442.8 | 5.42 | 436.6 | 14.93 |
| D5396-TW2-17 | 0.50 | 0.5463 | 0.0146 | 0.0716 | 0.0008 | 0.0220 | 0.0006 | 442.6 | 9.57  | 446.0 | 4.80 | 439.1 | 12.52 |
| D5396-TW2-18 | 0.75 | 0.5480 | 0.0193 | 0.0717 | 0.0008 | 0.0221 | 0.0006 | 443.7 | 12.69 | 446.2 | 4.53 | 441.5 | 12.04 |
| D5396-TW2-19 | 1.01 | 0.5536 | 0.0157 | 0.0725 | 0.0009 | 0.0220 | 0.0006 | 447.4 | 10.28 | 451.0 | 5.12 | 440.1 | 10.91 |
| D5396-TW2-20 | 0.78 | 0.5556 | 0.0175 | 0.0726 | 0.0008 | 0.0225 | 0.0006 | 448.6 | 11.44 | 451.7 | 4.52 | 450.2 | 12.26 |
| D5396-TW2-21 | 1.58 | 0.5458 | 0.0126 | 0.0713 | 0.0006 | 0.0219 | 0.0004 | 442.2 | 8.31  | 444.2 | 3.61 | 438.3 | 7.35  |
| D5396-TW2-22 | 0.81 | 0.5492 | 0.0132 | 0.0718 | 0.0007 | 0.0218 | 0.0004 | 444.5 | 8.62  | 446.8 | 4.06 | 436.1 | 7.76  |
| D5396-TW2-23 | 1.19 | 0.5481 | 0.0110 | 0.0717 | 0.0006 | 0.0221 | 0.0003 | 443.8 | 7.20  | 446.2 | 3.33 | 441.6 | 6.29  |
| D5396-TW2-24 | 0.48 | 0.5444 | 0.0208 | 0.0716 | 0.0007 | 0.0226 | 0.0008 | 441.3 | 13.67 | 445.6 | 4.46 | 452.5 | 16.51 |
| D5396-TW2-25 | 0.89 | 0.5509 | 0.0162 | 0.0721 | 0.0008 | 0.0222 | 0.0006 | 445.6 | 10.60 | 449.1 | 4.78 | 444.0 | 11.17 |
| D5396-TW2-26 | 0.71 | 0.5580 | 0.0116 | 0.0724 | 0.0006 | 0.0227 | 0.0004 | 450.2 | 7.59  | 450.4 | 3.49 | 453.6 | 8.48  |
| D5396-TW2-27 | 0.42 | 0.5506 | 0.0214 | 0.0712 | 0.0008 | 0.0220 | 0.0010 | 445.4 | 14.04 | 443.3 | 4.76 | 440.4 | 18.94 |

|              |      |        |        |        |        |        |        |       |       |       |      |       |       |
|--------------|------|--------|--------|--------|--------|--------|--------|-------|-------|-------|------|-------|-------|
| D5396-TW2-28 | 0.50 | 0.5325 | 0.0158 | 0.0714 | 0.0008 | 0.0227 | 0.0008 | 433.4 | 10.47 | 444.7 | 4.74 | 453.7 | 14.90 |
| D5396-TW2-29 | 0.68 | 0.5832 | 0.0168 | 0.0743 | 0.0008 | 0.0236 | 0.0007 | 466.5 | 10.80 | 462.1 | 4.92 | 471.7 | 14.09 |
| D5396-TW2-30 | 0.67 | 0.5699 | 0.0183 | 0.0714 | 0.0008 | 0.0206 | 0.0006 | 457.9 | 11.84 | 444.7 | 4.52 | 412.2 | 11.76 |
| D2145TW3-01  | 0.43 | 0.6310 | 0.0177 | 0.0798 | 0.0010 | 0.0252 | 0.0006 | 496.7 | 11.04 | 495.1 | 6.07 | 503.4 | 11.38 |
| D2145TW3-02  | 0.59 | 0.5169 | 0.0164 | 0.0685 | 0.0009 | 0.0205 | 0.0007 | 423.1 | 11.00 | 427.1 | 5.15 | 411.0 | 14.36 |
| D2145TW3-03  | 0.52 | 0.5278 | 0.0157 | 0.0673 | 0.0009 | 0.0204 | 0.0007 | 430.4 | 10.44 | 419.8 | 5.49 | 409.0 | 13.89 |
| D2145TW3-04  | 0.99 | 0.5145 | 0.0116 | 0.0671 | 0.0009 | 0.0220 | 0.0007 | 421.5 | 7.79  | 418.6 | 5.31 | 440.1 | 14.80 |
| D2145TW3-05  | 0.71 | 0.5191 | 0.0106 | 0.0677 | 0.0007 | 0.0219 | 0.0006 | 424.5 | 7.06  | 422.6 | 4.39 | 438.7 | 11.26 |
| D2145TW3-06  | 1.11 | 0.6059 | 0.0081 | 0.0698 | 0.0008 | 0.0209 | 0.0002 | 481.0 | 5.11  | 435.1 | 5.02 | 418.8 | 4.95  |
| D2145TW3-07  | 0.79 | 0.2673 | 0.0096 | 0.0380 | 0.0006 | 0.0113 | 0.0004 | 240.6 | 7.66  | 240.6 | 3.63 | 227.0 | 7.72  |
| D2145TW3-08  | 0.66 | 0.5153 | 0.0117 | 0.0679 | 0.0008 | 0.0207 | 0.0004 | 422.0 | 7.86  | 423.6 | 4.67 | 413.9 | 8.77  |
| D2145TW3-09  | 0.68 | 0.5258 | 0.0109 | 0.0679 | 0.0008 | 0.0209 | 0.0006 | 429.0 | 7.25  | 423.4 | 4.80 | 418.5 | 12.57 |
| D2145TW3-10  | 0.61 | 0.5266 | 0.0134 | 0.0686 | 0.0009 | 0.0205 | 0.0007 | 429.5 | 8.94  | 427.8 | 5.66 | 411.0 | 13.15 |
| D2145TW3-11  | 0.54 | 0.5141 | 0.0137 | 0.0675 | 0.0009 | 0.0206 | 0.0006 | 421.2 | 9.18  | 420.8 | 5.30 | 412.3 | 11.75 |
| D2145TW3-12  | 1.00 | 0.1546 | 0.0061 | 0.0221 | 0.0004 | 0.0067 | 0.0003 | 146.0 | 5.36  | 141.0 | 2.56 | 135.8 | 5.88  |
| D2145TW3-13  | 0.02 | 0.5198 | 0.0120 | 0.0678 | 0.0009 | 0.0190 | 0.0027 | 425.0 | 7.99  | 422.9 | 5.67 | 380.2 | 53.31 |
| D2145TW3-14  | 0.68 | 0.6510 | 0.0089 | 0.0825 | 0.0008 | 0.0247 | 0.0004 | 509.1 | 5.45  | 510.9 | 4.70 | 494.0 | 7.14  |
| D2145TW3-15  | 0.34 | 0.6496 | 0.0105 | 0.0827 | 0.0008 | 0.0243 | 0.0007 | 508.2 | 6.44  | 512.1 | 4.78 | 485.6 | 13.80 |
| D2145TW3-16  | 0.69 | 0.5198 | 0.0095 | 0.0681 | 0.0007 | 0.0200 | 0.0004 | 425.0 | 6.35  | 424.7 | 4.19 | 399.4 | 8.04  |
| D2145TW3-17  | 1.03 | 0.6465 | 0.0155 | 0.0819 | 0.0010 | 0.0239 | 0.0005 | 506.3 | 9.57  | 507.2 | 6.15 | 478.2 | 8.90  |
| D2145TW3-18  | 0.99 | 0.5261 | 0.0135 | 0.0677 | 0.0007 | 0.0213 | 0.0004 | 429.2 | 9.00  | 422.0 | 4.21 | 426.6 | 8.90  |
| D2145TW3-19  | 0.51 | 0.5539 | 0.0094 | 0.0710 | 0.0007 | 0.0216 | 0.0003 | 447.5 | 6.13  | 442.3 | 3.91 | 432.8 | 6.68  |
| D2145TW3-20  | 0.53 | 0.6512 | 0.0149 | 0.0826 | 0.0008 | 0.0268 | 0.0006 | 509.2 | 9.18  | 511.4 | 4.87 | 534.0 | 11.10 |
| D2145TW3-21  | 0.54 | 0.2970 | 0.0063 | 0.0422 | 0.0004 | 0.0130 | 0.0002 | 264.1 | 4.92  | 266.2 | 2.33 | 261.8 | 4.41  |
| D2145TW3-22  | 0.59 | 0.6562 | 0.0117 | 0.0827 | 0.0007 | 0.0256 | 0.0003 | 512.3 | 7.17  | 512.1 | 4.38 | 511.8 | 6.71  |
| D2145TW3-23  | 0.56 | 0.6597 | 0.0153 | 0.0825 | 0.0010 | 0.0257 | 0.0005 | 514.4 | 9.39  | 511.0 | 6.17 | 513.4 | 10.32 |
| D2145TW3-24  | 0.65 | 0.5306 | 0.0123 | 0.0692 | 0.0009 | 0.0213 | 0.0007 | 432.2 | 8.15  | 431.2 | 5.19 | 426.8 | 14.15 |
| D2145TW3-25  | 1.89 | 0.1309 | 0.0049 | 0.0195 | 0.0002 | 0.0062 | 0.0001 | 124.9 | 4.36  | 124.3 | 1.54 | 125.0 | 2.15  |
| D2145TW3-26  | 1.99 | 0.1386 | 0.0059 | 0.0200 | 0.0003 | 0.0062 | 0.0002 | 131.8 | 5.25  | 127.4 | 1.73 | 123.9 | 3.24  |
| D2145TW3-27  | 0.55 | 0.2643 | 0.0060 | 0.0376 | 0.0003 | 0.0122 | 0.0003 | 238.1 | 4.79  | 237.7 | 2.10 | 244.2 | 6.13  |
| D2145TW3-28  | 0.59 | 0.5258 | 0.0139 | 0.0680 | 0.0006 | 0.0208 | 0.0006 | 429.0 | 9.27  | 424.2 | 3.89 | 415.7 | 11.10 |
| D2145TW3-29  | 0.68 | 0.6952 | 0.0147 | 0.0869 | 0.0007 | 0.0268 | 0.0005 | 535.9 | 8.79  | 537.2 | 4.12 | 534.8 | 9.31  |
| D2145TW3-30  | 0.46 | 0.1264 | 0.0061 | 0.0194 | 0.0002 | 0.0061 | 0.0003 | 120.9 | 5.52  | 123.6 | 1.50 | 122.9 | 5.23  |

Table S2. Majore element (%) and trace element (×10-6) analys for Late Cambrian - Late Silurian volcanic rocks in Arong Qi.

| Epoch                          | Late Cambrian |       |        | Late Ordovician |       |       | Late Silurian |       |          |       |
|--------------------------------|---------------|-------|--------|-----------------|-------|-------|---------------|-------|----------|-------|
| Dating sam-<br>ples            | CY-YTTW1      |       |        | D5396TW2        |       |       | D5396TW1      |       | D2145TW3 |       |
| Samples                        | G1            | G2    | G3     | G4              | G5    | G8    | G6            | G7    | G9       | G10   |
| SiO <sub>2</sub>               | 48.72         | 57    | 62.43  | 60.95           | 61.24 | 61.66 | 62.79         | 61.1  | 61.62    | 60.83 |
| TiO <sub>2</sub>               | 1.71          | 1.02  | 0.76   | 0.71            | 0.57  | 0.67  | 0.47          | 0.56  | 1.01     | 1.44  |
| Al <sub>2</sub> O <sub>3</sub> | 16.99         | 15.72 | 18.23  | 16.67           | 16.98 | 17.14 | 18.08         | 17.1  | 17.52    | 16.69 |
| Fe <sub>2</sub> O <sub>3</sub> | 6.45          | 2.85  | 1.32   | 1.72            | 1.44  | 1.65  | 1.43          | 1.99  | 2.54     | 1.97  |
| FeO                            | 4             | 3.46  | 3.47   | 4.66            | 4.74  | 4.29  | 2.88          | 4.39  | 4.09     | 4.45  |
| MnO                            | 2             | 3.26  | 1.35   | 2.02            | 2.05  | 1.79  | 2.14          | 1.85  | 3.03     | 2.14  |
| MgO                            | 0.12          | 0.08  | 0.23   | 0.28            | 0.24  | 0.26  | 0.18          | 0.24  | 0.08     | 0.24  |
| CaO                            | 5.73          | 3.65  | 1.52   | 2.07            | 1.98  | 1.85  | 1.28          | 1.95  | 0.6      | 1.05  |
| Na <sub>2</sub> O              | 4.12          | 5.46  | 4.34   | 2.4             | 2.23  | 3.46  | 3.76          | 2.97  | 3.75     | 3.71  |
| K <sub>2</sub> O               | 2.38          | 2.17  | 4.27   | 5.87            | 6.3   | 4.5   | 5.16          | 5.27  | 1.95     | 3.84  |
| P <sub>2</sub> O <sub>5</sub>  | 0.57          | 0.37  | 0.31   | 0.44            | 0.36  | 0.36  | 0.41          | 0.42  | 0.26     | 0.36  |
| LOI                            | 7.31          | 4.92  | 1.93   | 1.78            | 1.68  | 1.95  | 1.59          | 1.79  | 3.78     | 3.26  |
| Total                          | 100.12        | 99.95 | 100.15 | 99.55           | 99.81 | 99.58 | 100.17        | 99.63 | 100.23   | 99.98 |
| [Mg#]                          | 2.14          | 2.31  | 8.09   | 7.44            | 6.61  | 7.44  | 7.14          | 6.47  | 2.19     | 6.44  |
| FeO*                           | 9.8           | 6.02  | 4.66   | 6.21            | 6.04  | 5.77  | 4.17          | 6.18  | 6.38     | 6.22  |
| Rb                             | 44.7          | 35.1  | 121    | 179             | 186   | 103   | 98.3          | 95.8  | 50       | 67    |
| Sr                             | 527           | 878   | 475    | 436             | 408   | 326   | 339           | 433   | 293      | 321   |
| Ba                             | 490           | 820   | 1000   | 1500            | 1700  | 1676  | 1100          | 1300  | 507      | 705   |
| Nb                             | 12.3          | 6.46  | 7.66   | 6.87            | 8.25  | 6.76  | 5.06          | 5.42  | 15.5     | 13.1  |
| Ta                             | 0.57          | 0.35  | 0.57   | 0.64            | 0.94  | 0.45  | 0.26          | 0.16  | 2.54     | 1.6   |
| Zr                             | 230           | 129   | 119    | 75.7            | 125   | 95.8  | 49.9          | 58    | 226      | 185   |
| Hf                             | 4.93          | 3.12  | 4.58   | 4.52            | 6.98  | 3.64  | 1.51          | 3.04  | 5.55     | 4.84  |
| Th                             | 2.69          | 3.4   | 2.69   | 6.45            | 15.6  | 1.93  | 2.62          | 2.97  | 6.35     | 3.11  |
| Cr                             | 6.68          | 44.6  | 5.72   | 5.95            | 6.98  | 6.55  | 14.9          | 14.8  | 84.1     | 55.4  |
| Ni                             | 10.2          | 18.8  | 4.62   | 3.92            | 2.59  | 3.34  | 3.83          | 4.95  | 53.1     | 3.75  |
| U                              | 0.59          | 0.91  | 1.49   | 4.08            | 4.27  | 1.23  | 0.72          | 0.93  | 1.28     | 1.32  |
| V                              | 168           | 109   | 44.2   | 102             | 90.9  | 41.7  | 72            | 69.6  | 113      | 101   |
| Co                             | 26.6          | 19.4  | 5.19   | 8.56            | 8.83  | 5.17  | 5.83          | 7.89  | 18.4     | 10.4  |

|                      |        |        |        |        |        |        |       |       |        |        |
|----------------------|--------|--------|--------|--------|--------|--------|-------|-------|--------|--------|
| Li                   | 27.2   | 41.1   | 61.3   | 41.2   | 49.3   | 56.1   | 31.8  | 33.5  | 44.7   | 38.1   |
| Be                   | 1.46   | 1      | 2      | 1.57   | 1.93   | 1.59   | 1.27  | 1.36  | 1.66   | 2      |
| La                   | 28.6   | 22.6   | 22.7   | 32.5   | 27.2   | 16.9   | 12    | 14    | 27.6   | 28.1   |
| Ce                   | 61.3   | 47     | 54.5   | 69.7   | 61.9   | 41.2   | 25.1  | 29.6  | 57.6   | 55.2   |
| Pr                   | 8.32   | 6.09   | 7.5    | 9.13   | 7.85   | 5.39   | 3.63  | 4.42  | 7.39   | 7.45   |
| Nd                   | 36.9   | 25.7   | 32.8   | 37.4   | 32.5   | 24     | 15.3  | 19    | 29.1   | 30.2   |
| Sm                   | 6.86   | 4.59   | 7.15   | 7.56   | 6.75   | 5.16   | 3.3   | 4.2   | 5.58   | 6.17   |
| Eu                   | 1.81   | 1.58   | 1.88   | 2      | 1.95   | 1.39   | 1.12  | 1.5   | 1.44   | 1.55   |
| Gd                   | 5.43   | 3.44   | 6.18   | 6.34   | 5.73   | 4.32   | 2.61  | 3.37  | 4.62   | 5.11   |
| Tb                   | 0.75   | 0.44   | 1.03   | 1.07   | 0.95   | 0.72   | 0.47  | 0.6   | 0.75   | 0.78   |
| Dy                   | 4.75   | 2.57   | 6.13   | 6.11   | 5.6    | 4.4    | 2.65  | 3.34  | 4.23   | 4.32   |
| Ho                   | 0.86   | 0.43   | 1.26   | 1.23   | 1.12   | 0.86   | 0.54  | 0.7   | 0.85   | 1.35   |
| Er                   | 2.17   | 1.14   | 3.61   | 3.36   | 3.17   | 2.54   | 1.67  | 2.14  | 2.32   | 3.12   |
| Tm                   | 0.34   | 0.16   | 0.66   | 0.62   | 0.58   | 0.45   | 0.28  | 0.36  | 0.37   | 0.35   |
| Yb                   | 2.14   | 0.97   | 4.1    | 3.66   | 3.84   | 2.91   | 1.92  | 2.51  | 2.37   | 2.55   |
| Lu                   | 0.31   | 0.16   | 0.59   | 0.55   | 0.55   | 0.44   | 0.28  | 0.38  | 0.35   | 0.41   |
| Y                    | 25.2   | 12.8   | 31.5   | 33.4   | 31.5   | 22.1   | 11.6  | 17.6  | 19     | 21     |
| ΣREE                 | 160.54 | 116.87 | 150.09 | 181.23 | 159.69 | 110.68 | 70.87 | 86.12 | 144.57 | 146.66 |
| LR/HR                | 8.58   | 11.55  | 5.37   | 6.90   | 6.41   | 5.65   | 5.80  | 5.43  | 8.12   | 7.15   |
| (La/Yb) <sub>N</sub> | 9.03   | 15.74  | 3.74   | 6.00   | 4.79   | 3.92   | 4.22  | 3.77  | 7.87   | 7.45   |
| (La/Sm) <sub>N</sub> | 2.62   | 3.10   | 2.00   | 2.71   | 2.54   | 2.06   | 2.29  | 2.10  | 3.11   | 2.87   |
| (Gd/Yb) <sub>N</sub> | 2.06   | 2.87   | 1.22   | 1.40   | 1.21   | 1.20   | 1.10  | 1.09  | 1.58   | 1.62   |
| δEu                  | 0.88   | 1.17   | 0.84   | 0.86   | 0.93   | 0.88   | 1.13  | 1.18  | 0.84   | 0.82   |
